# Supplementary material for: Metabolomic profiles in Jamaican children with and without autism spectrum disorder
Source: PubMed Central journal article supplement (PMC10980079), 2024-03-11
Supplement: NIHPP2403.07147V1-supplement-1.pdf [file NIHPP2403.07147V1-supplement-1.pdf]

# Supplement

## Metabolomic profiles in Jamaican children with and without autism spectrum disorder

**Figure S1. Batch effect correction.**

**A.** Data representation using first two principal components before the correction.

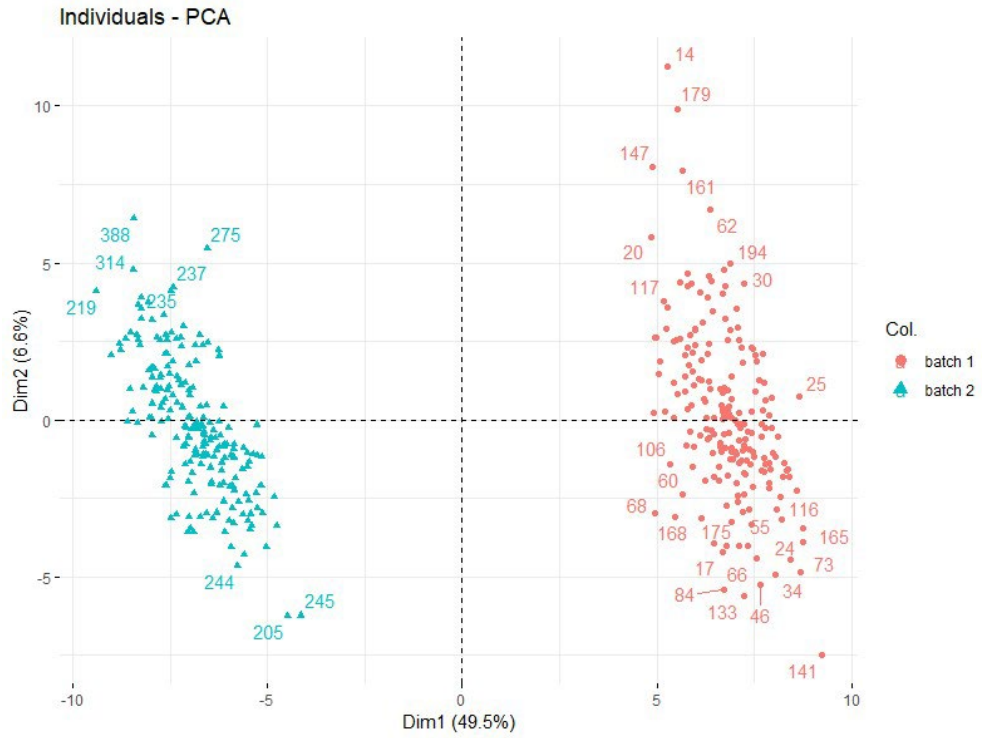

**B. Data representation using first two principal components after the correction.**

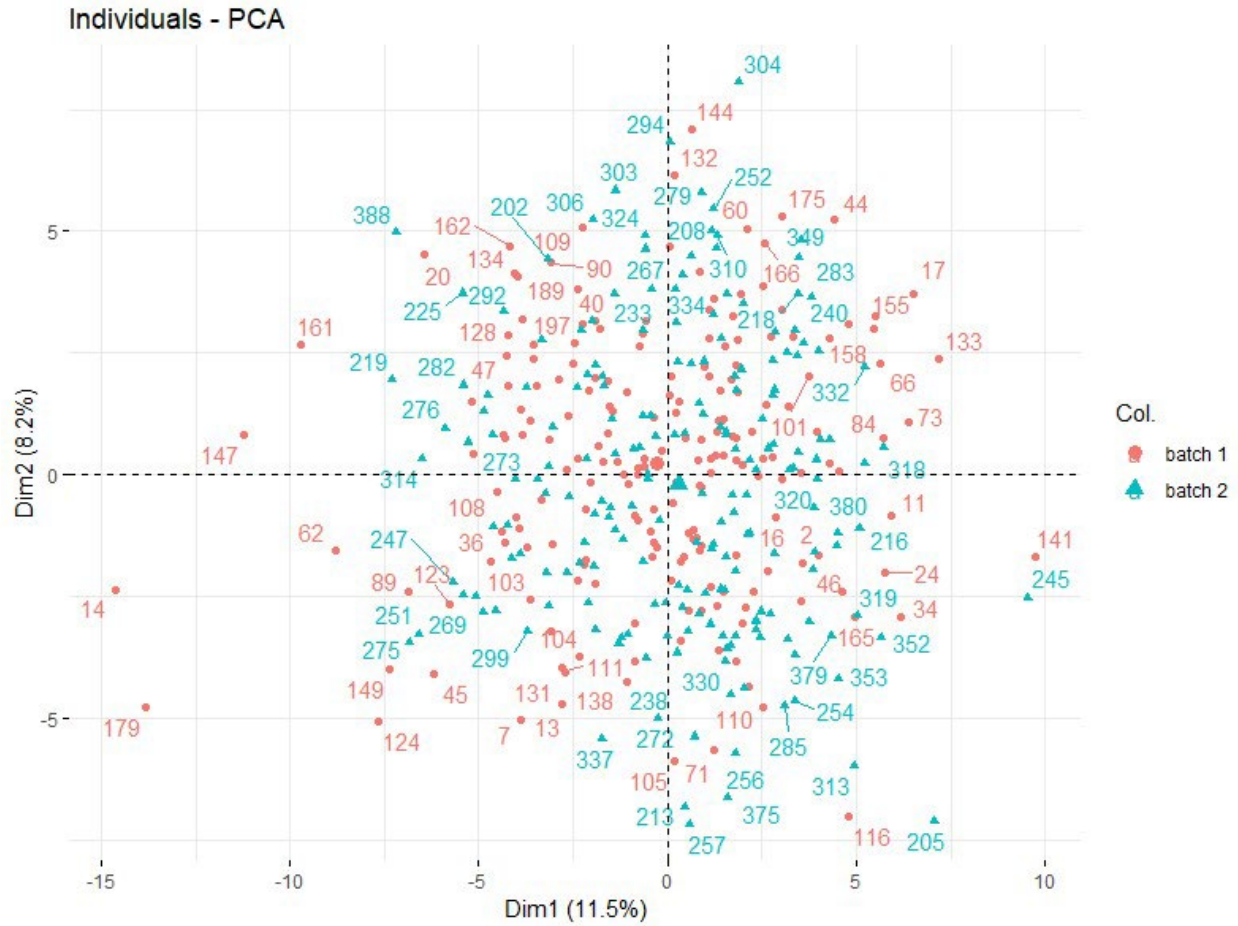





**Table S1.** By performing the Chi-square test or Fisher's exact test (\*), we investigated the potential distinctions in dietary patterns between ASD and TD control groups based on food consumption scores obtained from questionnaires.

|                           | <b>TD control group<br/>(N=200)</b> | <b>ASD group<br/>(N=200)</b> | <b>Total<br/>(N=400)</b> | <b>p-value</b>    |
|---------------------------|-------------------------------------|------------------------------|--------------------------|-------------------|
| <b>Sea fish</b>           |                                     |                              |                          | <b>0.004</b>      |
| Consumed                  | 133 (66.5%)                         | 105 (52.5%)                  | 238 (59.5%)              |                   |
| Not Consumed              | 67 (33.5%)                          | 95 (47.5%)                   | 162 (40.5%)              |                   |
| <b>Fresh water</b>        |                                     |                              |                          | <b>0.182</b>      |
| Consumed                  | 49 (24.5%)                          | 38 (19.0%)                   | 87 (21.8%)               |                   |
| Not Consumed              | 151 (75.5%)                         | 162 (81.0%)                  | 313 (78.2%)              |                   |
| <b>Sardine</b>            |                                     |                              |                          | <b>&lt; 0.001</b> |
| Consumed                  | 170 (85.0%)                         | 139 (69.5%)                  | 309 (77.2%)              |                   |
| Not Consumed              | 30 (15.0%)                          | 61 (30.5%)                   | 91 (22.8%)               |                   |
| <b>Tuna</b>               |                                     |                              |                          | <b>0.196</b>      |
| Consumed                  | 69 (34.5%)                          | 57 (28.5%)                   | 126 (31.5%)              |                   |
| Not Consumed              | 131 (65.5%)                         | 143 (71.5%)                  | 274 (68.5%)              |                   |
| <b>Saltfish</b>           |                                     |                              |                          | <b>&lt; 0.001</b> |
| Consumed                  | 158 (79.0%)                         | 113 (56.5%)                  | 271 (67.8%)              |                   |
| Not Consumed              | 42 (21.0%)                          | 87 (43.5%)                   | 129 (32.2%)              |                   |
| <b>Shell fish lobster</b> |                                     |                              |                          | <b>&lt; 0.001</b> |
| Consumed                  | 33 (16.5%)                          | 6 (3.0%)                     | 39 (9.8%)                |                   |
| Not Consumed              | 167 (83.5%)                         | 194 (97.0%)                  | 361 (90.2%)              |                   |
| <b>Shrimp</b>             |                                     |                              |                          | <b>&lt; 0.001</b> |
| Consumed                  | 33 (16.5%)                          | 6 (3.0%)                     | 39 (9.8%)                |                   |
| Not Consumed              | 167 (83.5%)                         | 194 (97.0%)                  | 361 (90.2%)              |                   |
| <b>Packaged fish</b>      |                                     |                              |                          | <b>0.388</b>      |
| Consumed                  | 38 (19.0%)                          | 45 (22.5%)                   | 83 (20.8%)               |                   |
| Not Consumed              | 162 (81.0%)                         | 155 (77.5%)                  | 317 (79.2%)              |                   |
| <b>Beef</b>               |                                     |                              |                          | <b>0.085</b>      |
| Consumed                  | 92 (46.0%)                          | 75 (37.5%)                   | 167 (41.8%)              |                   |
| Not Consumed              | 108 (54.0%)                         | 125 (62.5%)                  | 233 (58.2%)              |                   |
| <b>Lamb mutton</b>        |                                     |                              |                          | <b>0.110</b>      |
| Consumed                  | 33 (16.5%)                          | 22 (11.0%)                   | 55 (13.8%)               |                   |
| Not Consumed              | 167 (83.5%)                         | 178 (89.0%)                  | 345 (86.2%)              |                   |
| <b>Goat</b>               |                                     |                              |                          | <b>&lt; 0.001</b> |
| Consumed                  | 101 (50.5%)                         | 68 (34.0%)                   | 169 (42.2%)              |                   |

|                          | <b>TD control group<br/>(N=200)</b> | <b>ASD group<br/>(N=200)</b> | <b>Total<br/>(N=400)</b> | <b>p-value</b>     |
|--------------------------|-------------------------------------|------------------------------|--------------------------|--------------------|
| Not Consumed             | 99 (49.5%)                          | 132 (66.0%)                  | 231 (57.8%)              |                    |
| <b>Pork</b>              |                                     |                              |                          | <b>&lt; 0.001</b>  |
| Consumed                 | 112 (56.0%)                         | 79 (39.5%)                   | 191 (47.8%)              |                    |
| Not Consumed             | 88 (44.0%)                          | 121 (60.5%)                  | 209 (52.2%)              |                    |
| <b>Liver</b>             |                                     |                              |                          | <b>0.009</b>       |
| Consumed                 | 117 (58.5%)                         | 91 (45.5%)                   | 208 (52.0%)              |                    |
| Not Consumed             | 83 (41.5%)                          | 109 (54.5%)                  | 192 (48.0%)              |                    |
| <b>Chicken</b>           |                                     |                              |                          | <b>0.006*</b>      |
| Consumed                 | 196 (98.0%)                         | 184 (92.0%)                  | 380 (95.0%)              |                    |
| Not Consumed             | 4 (2.0%)                            | 16 (8.0%)                    | 20 (5.0%)                |                    |
| <b>Milk</b>              |                                     |                              |                          | <b>0.229</b>       |
| Consumed                 | 98 (49.0%)                          | 86 (43.0%)                   | 184 (46.0%)              |                    |
| Not Consumed             | 102 (51.0%)                         | 114 (57.0%)                  | 216 (54.0%)              |                    |
| <b>Cheese</b>            |                                     |                              |                          | <b>&lt; 0.001</b>  |
| Consumed                 | 165 (82.5%)                         | 134 (67.0%)                  | 299 (74.8%)              |                    |
| Not Consumed             | 35 (17.5%)                          | 66 (33.0%)                   | 101 (25.2%)              |                    |
| <b>Yogurt</b>            |                                     |                              |                          | <b>0.004</b>       |
| Consumed                 | 68 (34.0%)                          | 42 (21.0%)                   | 110 (27.5%)              |                    |
| Not Consumed             | 132 (66.0%)                         | 158 (79.0%)                  | 290 (72.5%)              |                    |
| <b>Eggs</b>              |                                     |                              |                          | <b>&lt; 0.001</b>  |
| Consumed                 | 172 (86.0%)                         | 144 (72.0%)                  | 316 (79.0%)              |                    |
| Not Consumed             | 28 (14.0%)                          | 56 (28.0%)                   | 84 (21.0%)               |                    |
| <b>Rice</b>              |                                     |                              |                          | <b>&lt; 0.001*</b> |
| Consumed                 | 199 (99.5%)                         | 178 (89.0%)                  | 377 (94.2%)              |                    |
| Not Consumed             | 1 (0.5%)                            | 22 (11.0%)                   | 23 (5.8%)                |                    |
| <b>Fried dumpling</b>    |                                     |                              |                          | <b>0.140</b>       |
| Consumed                 | 154 (77.0%)                         | 141 (70.5%)                  | 295 (73.8%)              |                    |
| Not Consumed             | 46 (23.0%)                          | 59 (29.5%)                   | 105 (26.2%)              |                    |
| <b>Boiled dumpling</b>   |                                     |                              |                          | <b>&lt; 0.001</b>  |
| Consumed                 | 184 (92.0%)                         | 154 (77.0%)                  | 338 (84.5%)              |                    |
| Not Consumed             | 16 (8.0%)                           | 46 (23.0%)                   | 62 (15.5%)               |                    |
| <b>White bread</b>       |                                     |                              |                          | <b>&lt; 0.001</b>  |
| Consumed                 | 140 (70.0%)                         | 103 (51.5%)                  | 243 (60.8%)              |                    |
| Not Consumed             | 60 (30.0%)                          | 97 (48.5%)                   | 157 (39.2%)              |                    |
| <b>Whole wheat bread</b> |                                     |                              |                          | <b>0.760</b>       |
| Consumed                 | 121 (60.5%)                         | 118 (59.0%)                  | 239 (59.8%)              |                    |
| Not Consumed             | 79 (39.5%)                          | 82 (41.0%)                   | 161 (40.2%)              |                    |

|                     | <b>TD control group<br/>(N=200)</b> | <b>ASD group<br/>(N=200)</b> | <b>Total<br/>(N=400)</b> | <b>p-value</b> |
|---------------------|-------------------------------------|------------------------------|--------------------------|----------------|
| <b>Cakes bun</b>    |                                     |                              |                          | 0.003          |
| Consumed            | 164 (82.0%)                         | 138 (69.0%)                  | 302 (75.5%)              |                |
| Not Consumed        | 36 (18.0%)                          | 62 (31.0%)                   | 98 (24.5%)               |                |
| <b>Porridge</b>     |                                     |                              |                          | 0.003          |
| Consumed            | 184 (92.0%)                         | 164 (82.0%)                  | 348 (87.0%)              |                |
| Not Consumed        | 16 (8.0%)                           | 36 (18.0%)                   | 52 (13.0%)               |                |
| <b>Cold cereal</b>  |                                     |                              |                          | < 0.001        |
| Consumed            | 157 (78.5%)                         | 116 (58.0%)                  | 273 (68.2%)              |                |
| Not Consumed        | 43 (21.5%)                          | 84 (42.0%)                   | 127 (31.8%)              |                |
| <b>Macaroni</b>     |                                     |                              |                          | < 0.001        |
| Consumed            | 179 (89.5%)                         | 150 (75.0%)                  | 329 (82.2%)              |                |
| Not Consumed        | 21 (10.5%)                          | 50 (25.0%)                   | 71 (17.8%)               |                |
| <b>Peas</b>         |                                     |                              |                          | < 0.001        |
| Consumed            | 146 (73.0%)                         | 106 (53.0%)                  | 252 (63.0%)              |                |
| Not Consumed        | 54 (27.0%)                          | 94 (47.0%)                   | 148 (37.0%)              |                |
| <b>Beans</b>        |                                     |                              |                          | 0.011          |
| Consumed            | 94 (47.0%)                          | 69 (34.5%)                   | 163 (40.8%)              |                |
| Not Consumed        | 106 (53.0%)                         | 131 (65.5%)                  | 237 (59.2%)              |                |
| <b>Nuts</b>         |                                     |                              |                          | < 0.001        |
| Consumed            | 158 (79.0%)                         | 95 (47.5%)                   | 253 (63.2%)              |                |
| Not Consumed        | 42 (21.0%)                          | 105 (52.5%)                  | 147 (36.8%)              |                |
| <b>Yam</b>          |                                     |                              |                          | 0.008          |
| Consumed            | 147 (73.5%)                         | 122 (61.0%)                  | 269 (67.2%)              |                |
| Not Consumed        | 53 (26.5%)                          | 78 (39.0%)                   | 131 (32.8%)              |                |
| <b>Carrot</b>       |                                     |                              |                          | < 0.001        |
| Consumed            | 174 (87.0%)                         | 147 (73.5%)                  | 321 (80.2%)              |                |
| Not Consumed        | 26 (13.0%)                          | 53 (26.5%)                   | 79 (19.8%)               |                |
| <b>Lettuce</b>      |                                     |                              |                          | < 0.001        |
| Consumed            | 107 (53.5%)                         | 57 (28.5%)                   | 164 (41.0%)              |                |
| Not Consumed        | 93 (46.5%)                          | 143 (71.5%)                  | 236 (59.0%)              |                |
| <b>Callaloo</b>     |                                     |                              |                          | 0.001          |
| Consumed            | 153 (76.5%)                         | 123 (61.5%)                  | 276 (69.0%)              |                |
| Not Consumed        | 47 (23.5%)                          | 77 (38.5%)                   | 124 (31.0%)              |                |
| <b>Cabbage</b>      |                                     |                              |                          | < 0.001        |
| Consumed            | 148 (74.0%)                         | 109 (54.5%)                  | 257 (64.2%)              |                |
| Not Consumed        | 52 (26.0%)                          | 91 (45.5%)                   | 143 (35.8%)              |                |
| <b>String beans</b> |                                     |                              |                          | 0.020          |

|                        | <b>TD control group<br/>(N=200)</b> | <b>ASD group<br/>(N=200)</b> | <b>Total<br/>(N=400)</b> | <b>p-value</b>    |
|------------------------|-------------------------------------|------------------------------|--------------------------|-------------------|
| Consumed               | 59 (29.5%)                          | 39 (19.5%)                   | 98 (24.5%)               |                   |
| Not Consumed           | 141 (70.5%)                         | 161 (80.5%)                  | 302 (75.5%)              |                   |
| <b>Tomatoes</b>        |                                     |                              |                          | <b>&lt; 0.001</b> |
| Consumed               | 142 (71.0%)                         | 105 (52.5%)                  | 247 (61.8%)              |                   |
| Not Consumed           | 58 (29.0%)                          | 95 (47.5%)                   | 153 (38.2%)              |                   |
| <b>Ackee</b>           |                                     |                              |                          | <b>&lt; 0.001</b> |
| Consumed               | 155 (77.5%)                         | 94 (47.0%)                   | 249 (62.2%)              |                   |
| Not Consumed           | 45 (22.5%)                          | 106 (53.0%)                  | 151 (37.8%)              |                   |
| <b>Avocado</b>         |                                     |                              |                          | <b>&lt; 0.001</b> |
| Consumed               | 106 (53.0%)                         | 42 (21.0%)                   | 148 (37.0%)              |                   |
| Not Consumed           | 94 (47.0%)                          | 158 (79.0%)                  | 252 (63.0%)              |                   |
| <b>Green banana</b>    |                                     |                              |                          | <b>&lt; 0.001</b> |
| Consumed               | 155 (77.5%)                         | 123 (61.5%)                  | 278 (69.5%)              |                   |
| Not Consumed           | 45 (22.5%)                          | 77 (38.5%)                   | 122 (30.5%)              |                   |
| <b>Fried plantain</b>  |                                     |                              |                          | <b>&lt; 0.001</b> |
| Consumed               | 173 (86.5%)                         | 142 (71.0%)                  | 315 (78.8%)              |                   |
| Not Consumed           | 27 (13.5%)                          | 58 (29.0%)                   | 85 (21.2%)               |                   |
| <b>Ripe banana</b>     |                                     |                              |                          | <b>&lt; 0.001</b> |
| Consumed               | 189 (94.5%)                         | 162 (81.0%)                  | 351 (87.8%)              |                   |
| Not Consumed           | 11 (5.5%)                           | 38 (19.0%)                   | 49 (12.2%)               |                   |
| <b>Oranges</b>         |                                     |                              |                          | <b>&lt; 0.001</b> |
| Consumed               | 181 (90.5%)                         | 134 (67.0%)                  | 315 (78.8%)              |                   |
| Not Consumed           | 19 (9.5%)                           | 66 (33.0%)                   | 85 (21.2%)               |                   |
| <b>Tangerine</b>       |                                     |                              |                          | <b>&lt; 0.001</b> |
| Consumed               | 95 (47.5%)                          | 52 (26.0%)                   | 147 (36.8%)              |                   |
| Not Consumed           | 105 (52.5%)                         | 148 (74.0%)                  | 253 (63.2%)              |                   |
| <b>Grapes</b>          |                                     |                              |                          | <b>&lt; 0.001</b> |
| Consumed               | 123 (61.5%)                         | 79 (39.5%)                   | 202 (50.5%)              |                   |
| Not Consumed           | 77 (38.5%)                          | 121 (60.5%)                  | 198 (49.5%)              |                   |
| <b>Otaheite apples</b> |                                     |                              |                          | <b>&lt; 0.001</b> |
| Consumed               | 169 (84.5%)                         | 128 (64.0%)                  | 297 (74.2%)              |                   |
| Not Consumed           | 31 (15.5%)                          | 72 (36.0%)                   | 103 (25.8%)              |                   |
| <b>Pineapples</b>      |                                     |                              |                          | <b>&lt; 0.001</b> |
| Consumed               | 143 (71.5%)                         | 90 (45.0%)                   | 233 (58.2%)              |                   |
| Not Consumed           | 57 (28.5%)                          | 110 (55.0%)                  | 167 (41.8%)              |                   |
| <b>American apples</b> |                                     |                              |                          | <b>0.002</b>      |
| Consumed               | 78 (39.0%)                          | 49 (24.5%)                   | 127 (31.8%)              |                   |



|                        | <b>TD control group<br/>(N=200)</b> | <b>ASD group<br/>(N=200)</b> | <b>Total<br/>(N=400)</b> | <b>p-value</b> |
|------------------------|-------------------------------------|------------------------------|--------------------------|----------------|
| Not Consumed           | 122 (61.0%)                         | 151 (75.5%)                  | 273 (68.2%)              |                |
| <b>Guinep</b>          |                                     |                              |                          | 0.041          |
| Consumed               | 12 (6.0%)                           | 4 (2.0%)                     | 16 (4.0%)                |                |
| Not Consumed           | 188 (94.0%)                         | 196 (98.0%)                  | 384 (96.0%)              |                |
| <b>Peach</b>           |                                     |                              |                          | 0.041*         |
| Consumed               | 12 (6.0%)                           | 4 (2.0%)                     | 16 (4.0%)                |                |
| Not Consumed           | 188 (94.0%)                         | 196 (98.0%)                  | 384 (96.0%)              |                |
| <b>Plums</b>           |                                     |                              |                          | < 0.001        |
| Consumed               | 98 (49.0%)                          | 24 (12.0%)                   | 122 (30.5%)              |                |
| Not Consumed           | 102 (51.0%)                         | 176 (88.0%)                  | 278 (69.5%)              |                |
| <b>Strawberry</b>      |                                     |                              |                          | 0.388          |
| Consumed               | 21 (10.5%)                          | 16 (8.0%)                    | 37 (9.2%)                |                |
| Not Consumed           | 179 (89.5%)                         | 184 (92.0%)                  | 363 (90.8%)              |                |
| <b>Naseberry</b>       |                                     |                              |                          | 0.004          |
| Consumed               | 70 (35.0%)                          | 44 (22.0%)                   | 114 (28.5%)              |                |
| Not Consumed           | 130 (65.0%)                         | 156 (78.0%)                  | 286 (71.5%)              |                |
| <b>Sweetsop</b>        |                                     |                              |                          | < 0.001        |
| Consumed               | 69 (34.5%)                          | 23 (11.5%)                   | 92 (23.0%)               |                |
| Not Consumed           | 131 (65.5%)                         | 177 (88.5%)                  | 308 (77.0%)              |                |
| <b>Mango</b>           |                                     |                              |                          | < 0.001        |
| Consumed               | 186 (93.0%)                         | 148 (74.0%)                  | 334 (83.5%)              |                |
| Not Consumed           | 14 (7.0%)                           | 52 (26.0%)                   | 66 (16.5%)               |                |
| <b>June plum</b>       |                                     |                              |                          | < 0.001        |
| Consumed               | 142 (71.0%)                         | 74 (37.0%)                   | 216 (54.0%)              |                |
| Not Consumed           | 58 (29.0%)                          | 126 (63.0%)                  | 184 (46.0%)              |                |
| <b>Juices</b>          |                                     |                              |                          | < 0.001        |
| Consumed               | 186 (93.0%)                         | 161 (80.5%)                  | 347 (86.8%)              |                |
| Not Consumed           | 14 (7.0%)                           | 39 (19.5%)                   | 53 (13.2%)               |                |
| <b>Beverages</b>       |                                     |                              |                          | 0.514          |
| Consumed               | 181 (90.5%)                         | 177 (88.5%)                  | 358 (89.5%)              |                |
| Not Consumed           | 19 (9.5%)                           | 23 (11.5%)                   | 42 (10.5%)               |                |
| <b>Soft drinks</b>     |                                     |                              |                          | 0.057          |
| Consumed               | 104 (52.0%)                         | 85 (42.5%)                   | 189 (47.2%)              |                |
| Not Consumed           | 96 (48.0%)                          | 115 (57.5%)                  | 211 (52.8%)              |                |
| <b>Tea substitutes</b> |                                     |                              |                          | < 0.001        |
| Consumed               | 185 (92.5%)                         | 160 (80.0%)                  | 345 (86.2%)              |                |
| Not Consumed           | 15 (7.5%)                           | 40 (20.0%)                   | 55 (13.8%)               |                |

|                        | <b>TD control group<br/>(N=200)</b> | <b>ASD group<br/>(N=200)</b> | <b>Total<br/>(N=400)</b> | <b>p-value</b>    |
|------------------------|-------------------------------------|------------------------------|--------------------------|-------------------|
| <b>Canned food</b>     |                                     |                              |                          | <b>&lt; 0.001</b> |
| Consumed               | 162 (81.0%)                         | 122 (61.0%)                  | 284 (71.0%)              |                   |
| Not Consumed           | 38 (19.0%)                          | 78 (39.0%)                   | 116 (29.0%)              |                   |
| <b>Aluminum foil</b>   |                                     |                              |                          | <b>0.303</b>      |
| Consumed               | 41 (20.5%)                          | 33 (16.5%)                   | 74 (18.5%)               |                   |
| Not Consumed           | 159 (79.5%)                         | 167 (83.5%)                  | 326 (81.5%)              |                   |
| <b>Unpeeled fruits</b> |                                     |                              |                          | <b>&lt; 0.001</b> |
| Consumed               | 179 (89.5%)                         | 124 (62.0%)                  | 303 (75.8%)              |                   |
| Not Consumed           | 21 (10.5%)                          | 76 (38.0%)                   | 97 (24.2%)               |                   |
| <b>Animal fat</b>      |                                     |                              |                          | <b>0.003</b>      |
| Consumed               | 44 (22.0%)                          | 22 (11.0%)                   | 66 (16.5%)               |                   |
| Not Consumed           | 156 (78.0%)                         | 178 (89.0%)                  | 334 (83.5%)              | <b>0.004</b>      |
